# Supplementary material
Source: publisher figshare collection journal article supplement (https://brill.figshare.com/articles/dataset/_/28247009)
Supplement: Supplementary file 1 [file 1]

TABLE S4 Robustness test matrix for the Gloco PCR-System with 0.004 ng DNA per reaction. NTC = Non-template control, water instead of DNA

| Temperature      | Gloco at 60 °C annealing temperature |        |            | Gloco at 61 °C annealing temperature |        |            |
|------------------|--------------------------------------|--------|------------|--------------------------------------|--------|------------|
| Mastermix        | QuantStudio                          | AriaDX | Stratagene | QuantStudio                          | AriaDX | Stratagene |
| Takyon           | 30.27                                | 30.64  | 31.06      | 30.25                                | 30.47  | 31.19      |
|                  | 30.49                                | 30.47  | 31.21      | 30.41                                | 30.69  | 31.40      |
|                  | 30.65                                | 30.61  | 31.37      | 30.57                                | 30.4   | 31.34      |
| Takyon NTC       | No Ct                                | 39.13  | No Ct      | No Ct                                | No Ct  | No Ct      |
| Steinbrenner     | 29.06                                | 29.58  | 29.64      | 29.21                                | 29.54  | 29.88      |
|                  | 29.31                                | 29.5   | 29.80      | 29.23                                | 29.53  | 29.80      |
|                  | 29.22                                | 29.54  | 29.79      | 29.24                                | 29.54  | 29.99      |
| Steinbrenner NTC | No Ct                                | No Ct  | No Ct      | No Ct                                | No Ct  | No Ct      |
