# Supplementary material
Source: publisher figshare collection journal article supplement (https://brill.figshare.com/articles/dataset/_/28247009)
Supplement: Supplementary file 2 [file 1]

TABLE S2      Origins of *G. locorojo* and *G. assimilis* samples based on 16S rRNA gene sequences as well as the accession numbers for their 16S rRNA and COI gene sequences

| Sample number | Sample origin                                                                                                                        | Percent identity <sup>1</sup> (%) | Genbank accession no. top hit <sup>1</sup> | Scientific name top BLAST hit <sup>1</sup> | Accession number 16S rRNA gene | Corresponding accession number COI gene |
|---------------|--------------------------------------------------------------------------------------------------------------------------------------|-----------------------------------|--------------------------------------------|--------------------------------------------|--------------------------------|-----------------------------------------|
| 101           | Local retailer Berlin<br>Insekten-Express,<br>Scharfenberger Str.<br>26, 13505 Berlin,<br>Germany                                    | 99.8                              | OQ379919                                   | <i>G. locorojo</i>                         | PP238701                       | PP234478                                |
| 102           | Local retailer Berlin<br>Mata mata<br>Terraristik, Gardes-<br>du-Corps-Str. 12,<br>14058 Berlin,<br>Germany                          | 99.8                              | OQ379919                                   | <i>G. locorojo</i>                         | PP238700                       | PP234479                                |
| 103           | German retailer,<br>proinsects e.K,<br>Käferweg 9, 32425<br>Minden, Germany                                                          | 99.4                              | OQ379919                                   | <i>G. locorojo</i>                         | PP238702                       | PP234480                                |
| 104           | German retailer,<br>Deichgrille e. K. ,<br>Am Harweh 15,<br>24539 Neumünster,<br>Germany                                             | 99.8                              | OQ379919                                   | <i>G. locorojo</i>                         | PP238703                       | PP234486                                |
| 105           | German retailer,<br><a href="http://www.tropic-shop.de">www.tropic-shop.de</a> ,<br>Klausheiderweg 25,<br>48531 Nordhorn,<br>Germany | 99.8                              | OQ379919                                   | <i>G. locorojo</i>                         | PP238704                       | PP234481                                |
| 106           | German retailer,<br>Home-of-<br>Insects.com,<br>Haarbergstr. 47 Haus<br>1,<br>99097 Erfurt,<br>Germany                               | 99.8                              | OQ379919                                   | <i>G. locorojo</i>                         | PP238705                       | PP234482                                |
| 107           | Swiss retailer,<br>Profiterr Schreiber,<br>Zelgäcker 7,<br>8967 Winden,<br>Switzerland                                               | 99.8                              | OQ379919                                   | <i>G. locorojo</i>                         | PP238706                       | PP234487                                |
| 108           | Breeding farm of the<br>Czech University of<br>Life Science,<br>Kamýcká 129<br>165 00 Praha –<br>Suchdol, Czech<br>Republic          | 100                               | OQ379919                                   | <i>G. locorojo</i>                         | PP238707                       | PP234483                                |
| 109           | Dutch retailer,<br>dekammishop.nl                                                                                                    | 100                               | OQ379919                                   | <i>G. locorojo</i>                         | PP238708                       | PP234484                                |

|     |                                                                                                      |      |          |                     |          |          |
|-----|------------------------------------------------------------------------------------------------------|------|----------|---------------------|----------|----------|
|     | Dr. Kuyperlaan 46,<br>5142 TD, Waalwijk,,<br>Netherlands                                             |      |          |                     |          |          |
| 110 | Danish retailer,<br>Krybdysiden.dk,<br>Mammen byvej 77,<br>8850 Bjerringbro,<br>Denmark              | 99.8 | OQ379919 | <i>G. locorojo</i>  | PP238709 | PP234485 |
| 201 | Professor David A<br>Gray, California<br>State University<br>Northridge, United<br>States of America | 98.8 | EF050746 | <i>G. assimilis</i> | PP231955 | PP234605 |
| 202 | Professor Sue<br>Bertram, Carleton<br>University, Ottawa,<br>Canada                                  | 99.8 | EF050747 | <i>G. assimilis</i> | PP231956 | PP234604 |

<sup>1</sup> based on max score.
