# Supplementary material
Source: publisher figshare collection journal article supplement (https://brill.figshare.com/articles/dataset/_/28247009)
Supplement: Supplementary file 3 [file 1]

RESEARCH ARTICLE

***Gryllus locorojo* or *Gryllus assimilis*? – PCR-based differentiation of two commonly confused crickets for pet and livestock feeding**

*F. König, J. Zagon, C. Garino and M. Winkel\**

German Federal Institute for Risk Assessment (BfR), Max-Dohrn Str.-8-10, 10589 Berlin, Germany; \*[matthias.winkel@bfr.bund.de](mailto:matthias.winkel@bfr.bund.de)

**Supplementary material**

FIGURE S1 Multialignment of *G. assimilis* COI-5P (GBUPS010-14, [http://www.boldsystems.org/index.php/Public\\_RecordView?processid=GBUPS010-14](http://www.boldsystems.org/index.php/Public_RecordView?processid=GBUPS010-14)), Folmer sequences of *G. locorojo* samples 101-110 analyzed in this work (PP234478-PP234486) and Folmer sequences of *G. assimilis* samples 201-202 analysed in this work (PP234604, PP234605). Numbers given after the species name are the identifiers of the samples used in this work. Annealing sites of Gloco and Gassim PCR-systems are highlighted with boxes.
