# Supplementary material
Source: publisher figshare collection journal article supplement (https://brill.figshare.com/articles/dataset/_/28247009)
Supplement: Supplementary file 4 [file 1]

TABLE S1      Specificity testing with Gassim and Gloco PCR systems with 126 different species.  
Given Ct-values are averages of 3 values unless otherwise stated

| Species                        | Ct values      |                |
|--------------------------------|----------------|----------------|
|                                | Gassim system  | Gloco system   |
| Insects- Orthoptera            |                |                |
| <i>Acheta domestica</i>        | No Ct          | No Ct          |
| <i>Gryllotalpidae spp</i>      | No Ct          | No Ct          |
| <i>Gryllus assimilis</i>       | 19.15          | 35.28          |
| <i>Gryllus bimaculatus</i>     | No Ct          | No Ct          |
| <i>Gryllus campestris</i>      | No Ct          | No Ct          |
| <i>Gryllus locorojo</i>        | 33.34          | 18.23          |
| <i>Gryllus pennsylvanicus</i>  | 33.38          | 38.31          |
| <i>Gryllodes sigillatus</i>    | No Ct          | No Ct          |
| <i>Gryllus texensis</i>        | 34.73          | No Ct          |
| <i>Locusta migratoria</i>      | No Ct          | No Ct          |
| <i>Schistocerca gregaria</i>   | No Ct          | No Ct          |
| <i>Teleogryllus derelictus</i> | No Ct          | 39.98          |
| <i>Teleogryllus spp.</i>       | No Ct          | No Ct          |
| Insects                        |                |                |
| <i>Alphitobius diaperinus</i>  | No Ct          | No Ct          |
| <i>Apis mellifera</i>          | No Ct          |                |
| <i>Blaptica dubia</i>          | No Ct          | No Ct          |
| <i>Bombyx mori</i>             | No Ct          | No Ct          |
| <i>Calliphora vomitoria</i>    | No Ct          | No Ct          |
| <i>Chilecomadia moorei</i>     | 44.88 (1 of 3) | No Ct          |
| <i>Drosophila melanogaster</i> | No Ct          | No Ct          |
| <i>Galleria mellonella</i>     | No Ct          | 40.27          |
| <i>Hermetia Illuscens</i>      | No Ct          | No Ct          |
| <i>Lucilia sericata</i>        | No Ct          | No Ct          |
| <i>Musca domestica</i>         | No Ct          | 39.87          |
| <i>Nauphoeta cinerea</i>       | No Ct          | No Ct          |
| <i>Phoetalia pallida</i>       | No Ct          | No Ct          |
| <i>Tenebrio molitor</i>        | No Ct          | No Ct          |
| <i>Zophobas morio</i>          | No Ct          | No Ct          |
| Crustaceans                    |                |                |
| <i>Cancer pagurus</i>          | No Ct          | No Ct          |
| <i>Cherax quadricarinatus</i>  | No Ct          | No Ct          |
| <i>Crangon crangon</i>         | No Ct          | No Ct          |
| <i>Homerus americanus</i>      | No Ct          | No Ct          |
| <i>Eriocheir sinensis</i>      | No Ct          | No Ct          |
| <i>Litopenaeus vannamei</i>    | No Ct          | No Ct          |
| <i>Nephrops norvegicus</i>     | No Ct          | 38.57 (1 of 3) |

|                                           |       |                |
|-------------------------------------------|-------|----------------|
| <i>Pandalus borealis</i>                  | No Ct | No Ct          |
| <i>Penaeus monodon</i>                    | No Ct | No Ct          |
| <i>Pleoticus muelleri</i>                 | No Ct | 40.15          |
| <i>Portunus pelagicus</i>                 | No Ct | 38.93 (1 of 3) |
| <i>Varuna litterata</i>                   | No Ct | No Ct          |
| <i>Xiphopenaeus kroyeri</i>               | No Ct | No Ct          |
| <i>Euphausiacea spp.</i><br>(Krill flour) | No Ct | No Ct          |
| Molluscs                                  |       |                |
| <i>Achatina fulica</i>                    | No Ct | No Ct          |
| <i>Amphioctopus aegina</i>                | No Ct | No Ct          |
| <i>Buccinum spp.</i>                      | No Ct | No Ct          |
| <i>Callista chione</i>                    | No Ct | No Ct          |
| <i>Cerastoderma edule</i>                 | No Ct | No Ct          |
| <i>Chamelea gallina</i>                   | No Ct | No Ct          |
| <i>Crassostrea gigas</i>                  | No Ct | No Ct          |
| <i>Doryteuthis gahi</i>                   | No Ct | No Ct          |
| <i>Eledone moschata</i>                   | No Ct | No Ct          |
| <i>Glycymeris spp</i>                     | No Ct | No Ct          |
| <i>Littorina spp</i>                      | No Ct | No Ct          |
| <i>Loligo reynaudii</i>                   | No Ct | No Ct          |
| <i>Mercenaria spp</i>                     | No Ct | No Ct          |
| <i>Mizuhopecten yessoensis</i>            | No Ct | No Ct          |
| <i>Mytilus edulis</i>                     | No Ct | No Ct          |
| <i>Perna canalicus</i>                    | No Ct | 44.99 (1 of 3) |
| <i>Pecten maximus</i>                     | No Ct | No Ct          |
| <i>Ruditapes philipinarum</i>             | No Ct | No Ct          |
| <i>Sepia officinalis</i>                  | No Ct | No Ct          |
| <i>Spisula soldissima</i>                 | No Ct | No Ct          |
| Fish                                      |       |                |
| <i>Anguilla anguilla</i>                  | No Ct | No Ct          |
| <i>Cephalopholis fulva</i>                | No Ct | No Ct          |
| <i>Cyprinus carpio</i>                    | No Ct | No Ct          |
| <i>Dicentrarchus labrax</i>               | No Ct | No Ct          |
| <i>Esox lucius</i>                        | No Ct | No Ct          |
| <i>Gadus morhua</i>                       | No Ct | No Ct          |
| <i>Merluccius merluccius</i>              | No Ct | No Ct          |
| <i>Oncorhynchus mykiss</i>                | No Ct | No Ct          |
| <i>Oreochromis niloticus</i>              | No Ct | No Ct          |
| <i>Pleuronectes platessa</i>              | No Ct | No Ct          |
| <i>Reinhardtius hippoglossoides</i>       | No Ct | No Ct          |
| <i>Salmo salar</i>                        | No Ct | No Ct          |
| <i>Sander lucioperca</i>                  | No Ct | No Ct          |

|                             |       |       |
|-----------------------------|-------|-------|
| <i>Sardina pilchardus</i>   | No Ct | No Ct |
| <i>Scomber scombrus</i>     | No Ct | No Ct |
| <i>Spcorpaena</i>           | No Ct | No Ct |
| <i>cardinalis</i>           |       |       |
| <i>Sebastes marinus</i>     | No Ct | No Ct |
| <i>Solea solea</i>          | No Ct | No Ct |
| <i>Sparus aurata</i>        | No Ct | No Ct |
| <i>Squalus acanthias</i>    | No Ct | No Ct |
| Plants                      |       |       |
| <i>Allium sativum</i>       | No Ct | No Ct |
| (garlic)                    |       |       |
| <i>Anacardium</i>           | No Ct | No Ct |
| <i>occidentale</i> (cashew) |       |       |
| <i>Apium graveolens</i>     | No Ct | No Ct |
| (celery)                    |       |       |
| <i>Arachis hypogaea</i>     | No Ct | No Ct |
| (Peanut)                    |       |       |
| <i>Avena sativa</i> (Oat)   | No Ct | No Ct |
| <i>Brassica napus</i>       | No Ct | No Ct |
| (Rapeseed)                  |       |       |
| <i>Cannabis sativa</i>      | No Ct | No Ct |
| (Hemp)                      |       |       |
| <i>Capsicum annuum</i>      | No Ct | No Ct |
| (Paprika)                   |       |       |
| <i>Carum carvi</i>          | No Ct | No Ct |
| (Cumin)                     |       |       |
| <i>Carya illioinensis</i>   | No Ct | No Ct |
| (Pecan)                     |       |       |
| <i>Coriandrum sativum</i>   | No Ct | No Ct |
| (Koriander)                 |       |       |
| <i>Daucus carota</i>        | No Ct | No Ct |
| <i>subsp. sativus</i>       |       |       |
| (Carrot)                    |       |       |
| <i>Fagopyrum</i>            | No Ct | No Ct |
| <i>esculentum</i>           |       |       |
| (Buckwheat)                 |       |       |
| <i>Foeniculum vulgare</i>   | No Ct | No Ct |
| (fennel)                    |       |       |
| <i>Glycine max</i> (soy)    | No Ct | No Ct |
| <i>Helianthus annuus</i>    | No Ct | No Ct |
| (sunflower)                 |       |       |
| <i>Hordeum vulgare</i>      | No Ct | No Ct |
| (barley)                    |       |       |
| <i>Lupinus albus</i>        | No Ct | No Ct |
| (lupine)                    |       |       |
| <i>Macadamia</i>            | No Ct | No Ct |
| <i>integrifolia</i>         |       |       |
| (macadamia)                 |       |       |
| <i>Myristica fragrans</i>   | No Ct | No Ct |
| (nutmeg)                    |       |       |
| <i>Ocimum basilicum</i>     | No Ct | No Ct |
| (basil)                     |       |       |
| <i>Oryza sativa</i> (rice)  | No Ct | No Ct |

|                                                   |       |       |
|---------------------------------------------------|-------|-------|
| <i>Pistacia vera</i><br>(pistachio)               | No Ct | No Ct |
| <i>Pisum sativum</i> (pea)                        | No Ct | No Ct |
| <i>Prunus dulcis</i><br>(almond)                  | No Ct | No Ct |
| <i>Salvia rosmarinus</i><br>(rosemary)            | No Ct | No Ct |
| <i>Secale cereale</i> (rye)                       | No Ct | No Ct |
| <i>Solanum lycopersicum</i><br>(tomato)           | No Ct | No Ct |
| <i>Thymus spp</i> (Thyme)                         | No Ct | No Ct |
| <i>Triticum spp</i> (wheat)                       | No Ct | No Ct |
| <i>Triticum aestivum</i><br><i>spelta</i> (spelt) | No Ct | No Ct |
| <i>Zea mays</i> (maize)                           | No Ct | No Ct |
| <i>Zingiber officinale</i><br>(ginger)            | No Ct | No Ct |
| <b>Birds</b>                                      |       |       |
| <i>Anas platyrhynchos</i>                         | No Ct | No Ct |
| <i>Anser anser</i>                                | No Ct | No Ct |
| <i>Gallus domesticus</i>                          | No Ct | No Ct |
| <i>Meleagris gallopavo</i><br><i>domesticus</i>   | No Ct | No Ct |
| <b>Mammals</b>                                    |       |       |
| <i>Bos taurus</i> (cattle)                        | No Ct | No Ct |
| <i>Capra hircus</i> (goat)                        | No Ct | No Ct |
| <i>Lepus spp.</i> (hare)                          | No Ct | No Ct |
| <i>Ovis aries</i> (sheep)                         | No Ct | No Ct |
| <i>Sus domesticus</i> (pig)                       | No Ct | No Ct |
| <i>Equus ferus caballus</i><br>(Horse)            | No Ct | No Ct |
| <b>bacteria</b>                                   |       |       |
| <i>Arthrospira spp.</i><br>(spirulina)            | No Ct | No Ct |
