# Supplementary material
Source: publisher figshare collection journal article supplement (https://brill.figshare.com/articles/dataset/_/28247009)
Supplement: Supplementary file 5 [file 1]

TABLE S3 Robustness test matrix for the Gassim PCR-System with 0.02 ng DNA per reaction. NTC = Non-template control, water instead of DNA.

| Temperature:<br>Mastermix | Gassim at 62 °C annealing<br>temperature |        |            | Gassim at 63 °C annealing<br>temperature |        |            |
|---------------------------|------------------------------------------|--------|------------|------------------------------------------|--------|------------|
|                           | QuantStudio                              | AriaDX | Stratagene | QuantStudio                              | AriaDX | Stratagene |
| Takyon                    | 26.52                                    | 26.56  | 26.93      | 26.63                                    | 26.37  | 26.78      |
|                           | 26.56                                    | 26.31  | 26.89      | 26.63                                    | 29.29  | 26.60      |
|                           | 26.98                                    | 26.76  | 26.70      | 27.04                                    | 26.45  | 26.75      |
| Takyon NTC                | No Ct                                    | No Ct  | No Ct      | No Ct                                    | No Ct  | No Ct      |
| Steinbrenner              | 25.45                                    | 25.81  | 25.58      | 25.49                                    | 25.57  | 25.46      |
|                           | 25.68                                    | 25.85  | 25.77      | 25.50                                    | 25.83  | 25.28      |
|                           | 25.53                                    | 25.74  | 25.56      | 25.55                                    | 26.90  | 25.05      |
| Steinbrenner NTC          | No Ct                                    | No Ct  | No Ct      | No Ct                                    | No Ct  | No Ct      |
